# Supplementary material
Source: MDPI journal article supplement (https://www.mdpi.com/2673-4095/4/1/14)
Supplement: s1 [file s1 › surgeries-2225246-supplementary.pdf]

Table S1. Sample characteristics and results.

|                                       | GROUP A                        | GROUP B                        |
|---------------------------------------|--------------------------------|--------------------------------|
|                                       | <i>Under 25</i>                | <i>Over 25</i>                 |
| NUMBER AND SEX                        | 11 F (47.8 %)<br>12 M (52.2 %) | 14 F ( 42.4%)<br>19 M ( 57.6%) |
| MEAN AGE                              | 20.8 years<br>16–24<br>SD: 2.5 | 37.3 years<br>28–51<br>SD: 6.3 |
| AXILLARY HYPERHIDROSIS                | 2 patients, 8.6%               | 5 patients, 15.1%              |
| PALM HYPERHIDROSIS                    | 4 patients, 15.4%              | 11 patients, 33.3%             |
| AXILLARY AND PALM<br>HYPERHIDROSIS    | 17 patients, 76%               | 17 patients, 51.6%             |
| EARLY POST-OPERATIVE<br>COMPLICATIONS | 1 pneumonia                    |                                |
| LATE POST-OPERATIVE<br>COMPLICATIONS  | 1 left hemythorax dysesthesia  |                                |
| COMPENSATORY SWEATING                 | 6 (26%)                        | 8 (24%)                        |
| PRE-OPERATIVE IIRS SCORE              | 19.4<br>SD: 5.3                | 17.8<br>SD: 5.9                |
| POST-OPERATIVE IIRS SCORE             | 3.2<br>SD: 2.7                 | 4.2<br>SD: 4.4                 |
